# Supplementary material for: An artificial ruthenium-containing β-barrel protein for alkene–alkyne coupling reaction
Source: Royal Society of Chemistry journal article supplement (doi:10.1039/d1ob00279a), 2021-01-01
Supplement: d1ob00279a1.pdf [file d1ob00279a1.pdf]

Electronic Supporting Information

## An artificial ruthenium-containing $\beta$ -barrel protein for alkene-alkyne coupling reaction

Andreas Thiel <sup>a,†</sup>, Daniel F. Sauer <sup>a,b,†</sup>, Ulrich Markel <sup>b</sup>, M.A. Stephanie Mertens <sup>b</sup>, Tino Polen <sup>c</sup>, Ulrich Schwaneberg <sup>b,d</sup>, and Jun Okuda <sup>\*a</sup>

Andreas Thiel, Daniel F. Sauer, Ulrich Markel, M. A. Stephanie Mertens, Tino Polen, Ulrich Schwaneberg, and Jun Okuda

a. Institute of Inorganic Chemistry, RWTH Aachen University, Landoltweg 1, 52074 Aachen, Germany.

b. Institute of Biotechnology, RWTH Aachen University, Worringerweg 3, 52074 Aachen, Germany.

c. IBG-1: Biotechnology, Institute of Bio- and Geosciences, Forschungszentrum Jülich GmbH, 52425 Jülich, Germany

d. DWI - Leibniz Institute for Interactive Materials, Forckenbeckstr. 50, 52056, Aachen, Germany

† These authors contributed equally to this work.

\* Corresponding Author: [jun.okuda@ac.rwth-aachen.de](mailto:jun.okuda@ac.rwth-aachen.de)

## Table of contents

|                                                                                                                               |    |
|-------------------------------------------------------------------------------------------------------------------------------|----|
| ELECTRONIC SUPPORTING INFORMATION .....                                                                                       | 1  |
| 1. GENERAL REMARKS .....                                                                                                      | 3  |
| 2. EXPERIMENTAL SECTION .....                                                                                                 | 4  |
| 2.1. SYNTHESIS OF $[\text{Ru}(\text{Me}_4\text{CH}_2\text{Cp}^{\text{MAL}})(\text{C}_{10}\text{H}_8)][\text{BF}_4]$ (3) ..... | 4  |
| 2.2. SYNTHESIS OF $[\text{Ru}(\text{Me}_4\text{CH}_2\text{Cp}^{\text{MAL}})(\text{MECN})_3][\text{BF}_4]$ (4) .....           | 7  |
| 2.3. COUPLING TO FHUA .....                                                                                                   | 10 |
| 2.4. CD-SPECTROSCOPY .....                                                                                                    | 10 |
| 2.5. THIOGLO.....                                                                                                             | 12 |
| 2.6. MALDI-TOF MS .....                                                                                                       | 13 |
| 2.7. CATALYSIS .....                                                                                                          | 13 |
| 3. REFERENCES .....                                                                                                           | 14 |

## 1. General Remarks

All operations were performed under an inert atmosphere of dry argon or nitrogen using standard Schlenk line or glovebox techniques. Acetonitrile (MeCN),  $D_3$ -Acetonitrile ( $D_3$ -MeCN), and  $CD_2Cl_2$  were distilled under argon atmosphere from calcium hydride prior to use. Tetrahydrofuran (THF), diethyl ether ( $Et_2O$ ), and dichloromethane (DCM) were purified using a MB SPS-800 solvent purification system.  $^1H$ ,  $^{11}B\{^1H\}$ ,  $^{13}C\{^1H\}$ , and  $^{19}F\{^1H\}$  NMR spectra were recorded on a *Bruker Avance II 400* or a *Bruker Avance III HD 400* spectrometer at 25 °C in J. Young-type NMR tubes. Chemical shifts for  $^1H$  and  $^{13}C\{^1H\}$  spectra were referenced internally using the residual solvent resonance.<sup>1</sup> The resonances in the  $^1H$  and  $^{13}C\{^1H\}$  NMR spectra were assigned on the basis of two-dimensional NMR experiments (COSY, HSQC, HMBC). High-resolution mass spectrometry (HRMS) was performed on an LTQ-Orbitrap XL ESI-MS spectrometer (ThermoFisher Scientific). MALDI-ToF MS spectra were recorded on an Ultraflex III ToF/ToF mass spectrometer from *Bruker* using 2,5-dihydroxybenzoic acid (DHB) as matrix. Complex  $[Ru(Me_4CH_2Cp^{OH})(C_{10}H_8)][BF_4]$  (**1**)<sup>2</sup>, 3-(2,5-dioxo-2,5-dihydro-1H-pyrrol-1-yl)propanoyl chloride (**2**)<sup>3</sup> and the proteins (FhuA wildtype<sup>4</sup> and FhuA variant (FhuA  $\Delta$ 1-159\_C545\_V548\_F501\_tev or short FhuA  $\Delta$ CVF<sup>tev</sup>)<sup>5</sup>) have been synthesized as previously reported.

## 2. Experimental Section

### 2.1. Synthesis of $[\text{Ru}(\text{Me}_4\text{CH}_2\text{Cp}^{\text{Mal}})(\text{C}_{10}\text{H}_8)][\text{BF}_4]$ (**3**)

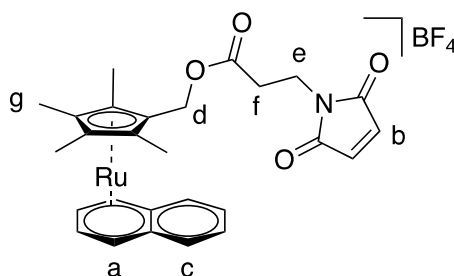

Under argon atmosphere,  $[\text{Ru}(\text{Me}_4\text{CH}_2\text{Cp}^{\text{OH}})(\text{C}_{10}\text{H}_8)][\text{BF}_4]$  (**1**) (100 mg, 0.21 mmol) and 3-(2,5-dioxo-2,5-dihydro-1H-pyrrol-1-yl)propanoyl chloride (**2**) (42.1 mg, 0.225 mmol) were placed in a Schlenk-flask and DCM (2 mL) was added. Subsequently, triethylamine (74  $\mu\text{L}$ , 0.54 mmol) was added dropwise. After stirring 16 h at room temperature, the brown suspension was extracted with  $\text{H}_2\text{O}$  (3 x 2 mL) to afford a clear brown solution. The organic layer was dried over  $\text{MgSO}_4$  and volatiles were removed *in vacuo*. Complex **3** was obtained as off-white solid (75 mg, 0.12 mmol, 57%).

$^1\text{H}$  NMR (400 MHz,  $\text{CD}_2\text{Cl}_2$ ):  $\delta$  = 7.71 (dd,  $^3J_{\text{HH}}$  = 6.8, 3.2 Hz, 2 H, naph- $H_a$ ), 7.55 (dd,  $^3J_{\text{HH}}$  = 6.7, 3.3 Hz, 2 H, naph- $H_a$ ), 6.67 (s, 2 H,  $H_b$ ), 6.60 (dd,  $^3J_{\text{HH}}$  = 4.4, 2.4 Hz, 2 H, naph- $H_c$ ), 6.09 (dd,  $^3J_{\text{HH}}$  = 4.4, 2.4 Hz, 2 H, naph- $H_c$ ), 4.63 (s, 2 H,  $H_d$ ), 3.73 (t,  $^3J_{\text{HH}}$  = 7.1 Hz, 2H,  $H_e$ ), 2.58 (t,  $^3J_{\text{HH}}$  = 7.1 Hz, 2H,  $H_f$ ), 1.68 (s, 6H,  $H_g$ ), 1.65 (s, 6H,  $H_g$ ) ppm.

$^{13}\text{C}\{^1\text{H}\}$  NMR (101 MHz,  $\text{CD}_2\text{Cl}_2$ ):  $\delta$  = 170.86 (C=O), 170.52 (C=O, mal), 134.77 (HC=CH), 132.16 (CH), 128.20 (CH), 98.01 ( $\text{C}_q$ , naph), 95.90 ( $\text{C}_q$ , Cp), 95.33 ( $\text{C}_q$ , Cp), 89.60 ( $\text{C}_q$ , Cp), 89.05 (CH), 86.18 (CH), 57.75 ( $\text{CH}_2$ ), 33.96 ( $\text{CH}_2$ ), 33.12 ( $\text{CH}_2$ ), 9.83 ( $\text{CH}_3$ ), 9.73 ( $\text{CH}_3$ ) ppm.

$^{11}\text{B}\{^1\text{H}\}$  NMR (128 MHz,  $\text{CD}_2\text{Cl}_2$ ):  $\delta$  = -0.93 (s) ppm.

$^{19}\text{F}\{^1\text{H}\}$  NMR (376 MHz,  $\text{CD}_2\text{Cl}_2$ ):  $\delta$  = -151.59 (s) ppm.

ESI MS ( $m/z$ ): calc  $[\text{C}_{27}\text{H}_{28}\text{NO}_4\text{Ru}]^+$ : 532.1062; found: 532.1065.

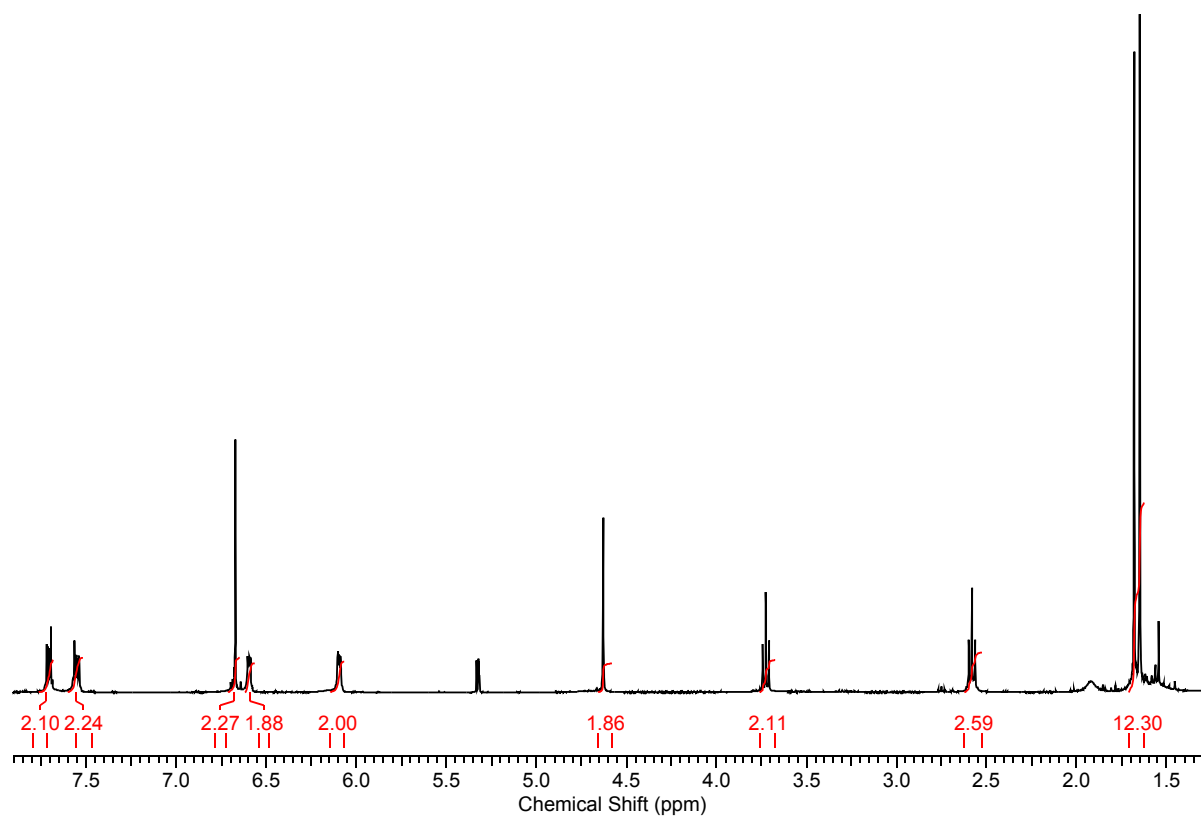

**Figure S1:**  $^1\text{H}$  NMR spectrum (400 MHz,  $\text{CD}_2\text{Cl}_2$ ,  $27^\circ\text{C}$ ) of  $[\text{Ru}(\text{Me}_4\text{CH}_2\text{Cp}^{\text{Mal}})(\text{C}_{10}\text{H}_8)][\text{BF}_4]$  (3).

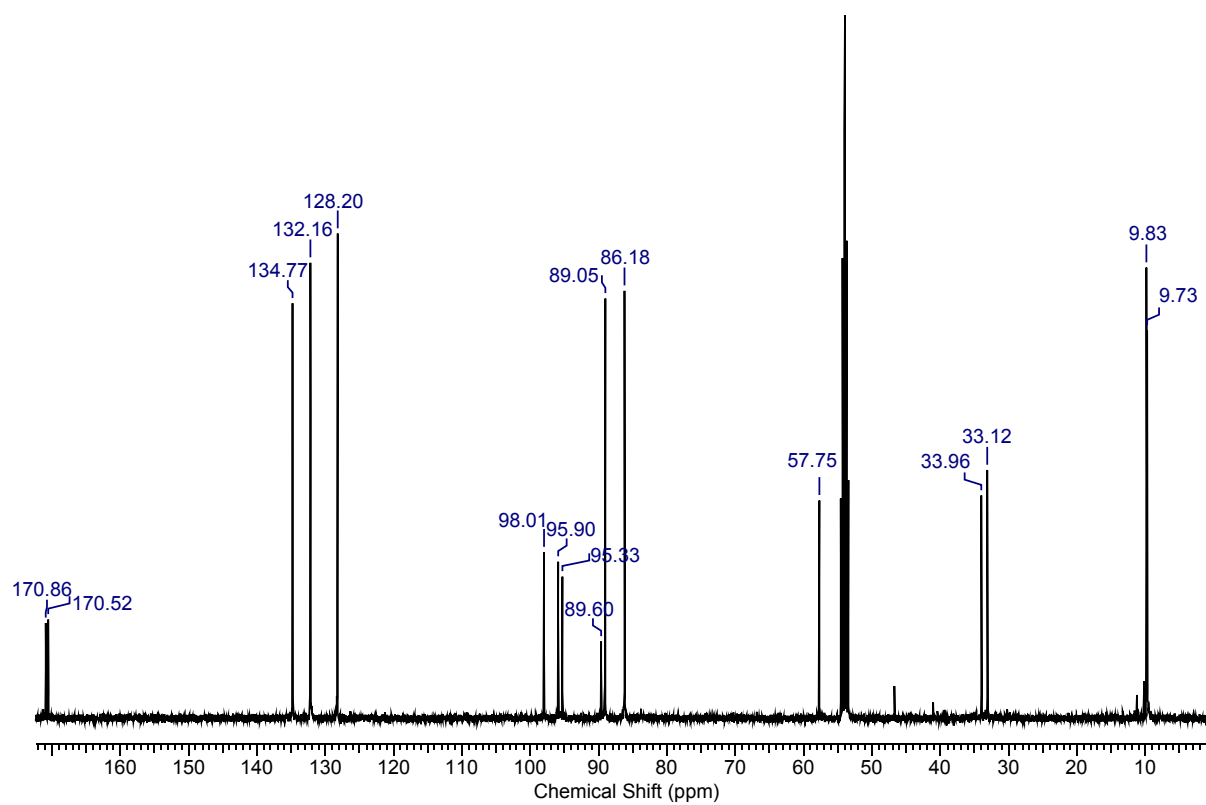

**Figure S2:**  $^{13}\text{C}\{^1\text{H}\}$  NMR spectrum (101 MHz,  $\text{CD}_2\text{Cl}_2$ , 27 °C) of  $[\text{Ru}(\text{Me}_4\text{CH}_2\text{Cp}^{\text{Mal}})(\text{C}_{10}\text{H}_8)][\text{BF}_4]$  (**3**).

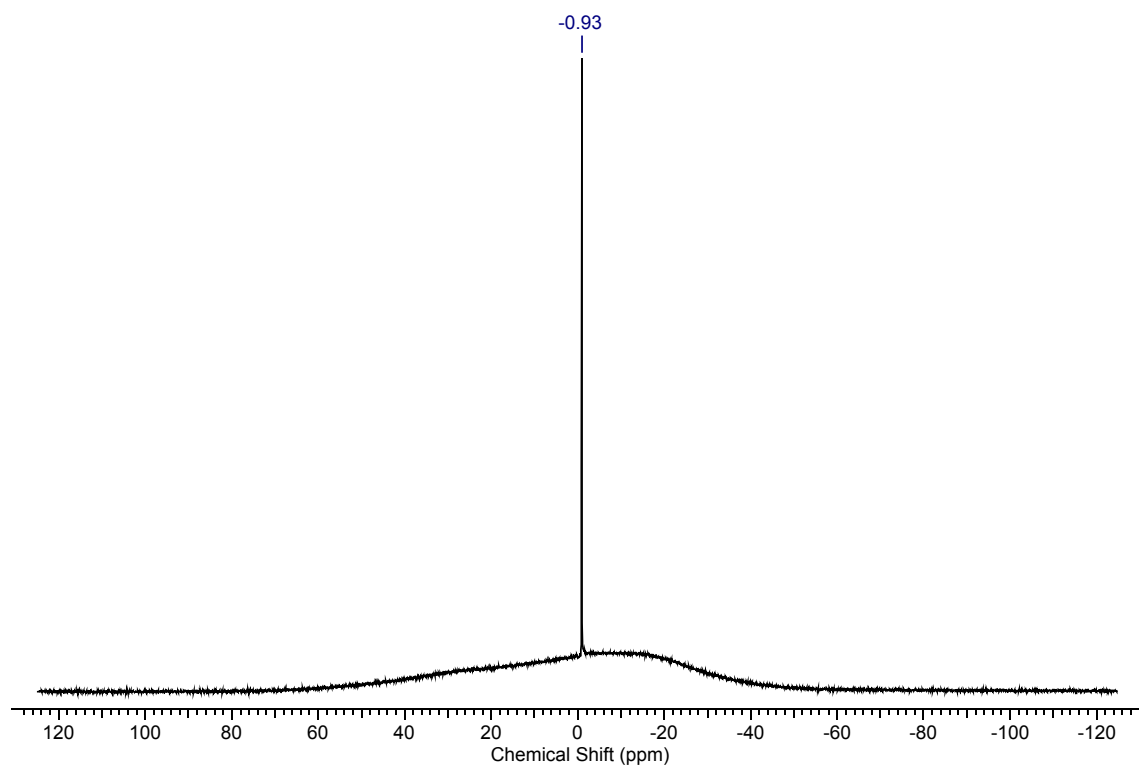

**Figure S3:**  $^{11}\text{B}\{^1\text{H}\}$  NMR spectrum (128 MHz,  $\text{CD}_2\text{Cl}_2$ , 27 °C) of  $[\text{Ru}(\text{Me}_4\text{CH}_2\text{Cp}^{\text{Mal}})(\text{C}_{10}\text{H}_8)][\text{BF}_4]$  (**3**).

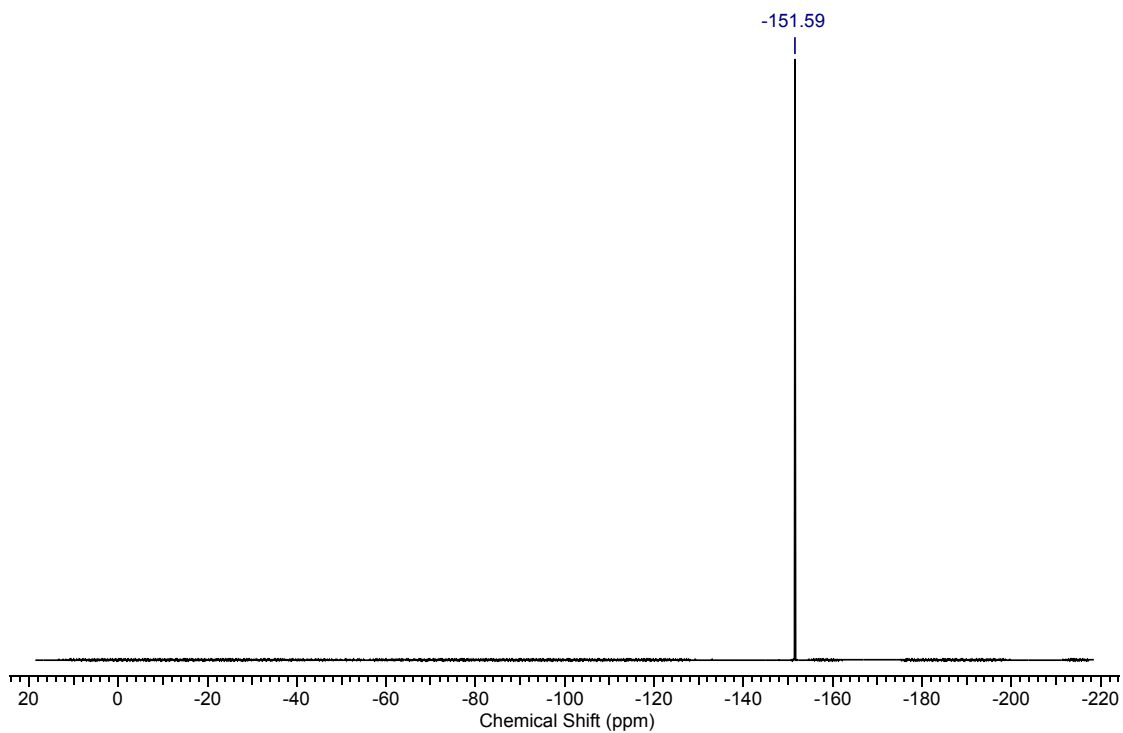

**Figure S4:**  $^{19}\text{F}\{^1\text{H}\}$  NMR spectrum (376 MHz,  $\text{CD}_2\text{Cl}_2$ , 27 °C) of  $[\text{Ru}(\text{Me}_4\text{CH}_2\text{Cp}^{\text{Mal}})(\text{C}_{10}\text{H}_8)][\text{BF}_4]$  (**3**).

## 2.2. Synthesis of $[\text{Ru}(\text{Me}_4\text{CH}_2\text{Cp}^{\text{Mal}})(\text{MeCN})_3][\text{BF}_4]$ (**4**)

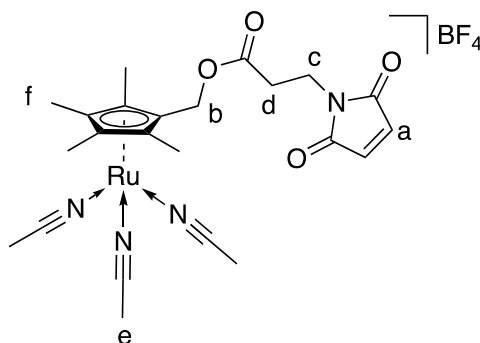

$[\text{Ru}(\text{Me}_4\text{CH}_2\text{Cp}^{\text{Mal}})(\text{C}_{10}\text{H}_8)][\text{BF}_4]$  (**3**) (24 mg, 39  $\mu\text{mol}$ ) was dissolved in MeCN (1 mL) and stirred at ambient temperature for 24 h. The solution was concentrated to 0.5 mL and washed with  $\text{Et}_2\text{O}$  (3 x 2 mL) and cyclohexane (3 x 1 mL). The solution was evaporated affording compound **4** as forest-green solid (15 mg, 24  $\mu\text{mol}$ , 63%).

$^1\text{H}$  NMR (400 MHz,  $\text{CD}_3\text{CN}$ ):  $\delta$  = 6.71 (s, 2H,  $H_a$ ), 4.69 (s, 2H,  $H_b$ ), 3.69 (t,  $^3J_{\text{HH}}$  = 7.0 Hz, 2H,  $H_c$ ), 2.57 (t,  $^3J_{\text{HH}}$  = 7.0 Hz, 2H,  $H_d$ ), 2.14 (s, 9H,  $H_e$ ), 1.65 (s, 6H,  $H_f$ ), 1.63 (s, 6H,  $H_f$ ) ppm.

$^{11}\text{B}\{^1\text{H}\}$  NMR (128 MHz,  $\text{CD}_2\text{Cl}_2$ ):  $\delta$  = -1.19 (s) ppm.

$^{19}\text{F}\{^1\text{H}\}$  NMR (376 MHz,  $\text{CD}_2\text{Cl}_2$ ):  $\delta$  = -153.369 (s) ppm.

ESI MS ( $m/z$ ):  $[\text{C}_{19}\text{H}_{23}\text{N}_2\text{O}_4\text{Ru}]^+$  calc: 445.0696; found: 445.0692. and  $[\text{C}_{17}\text{H}_{20}\text{NO}_4\text{Ru}]^+$  calc: 404.0430; found: 404.0434.



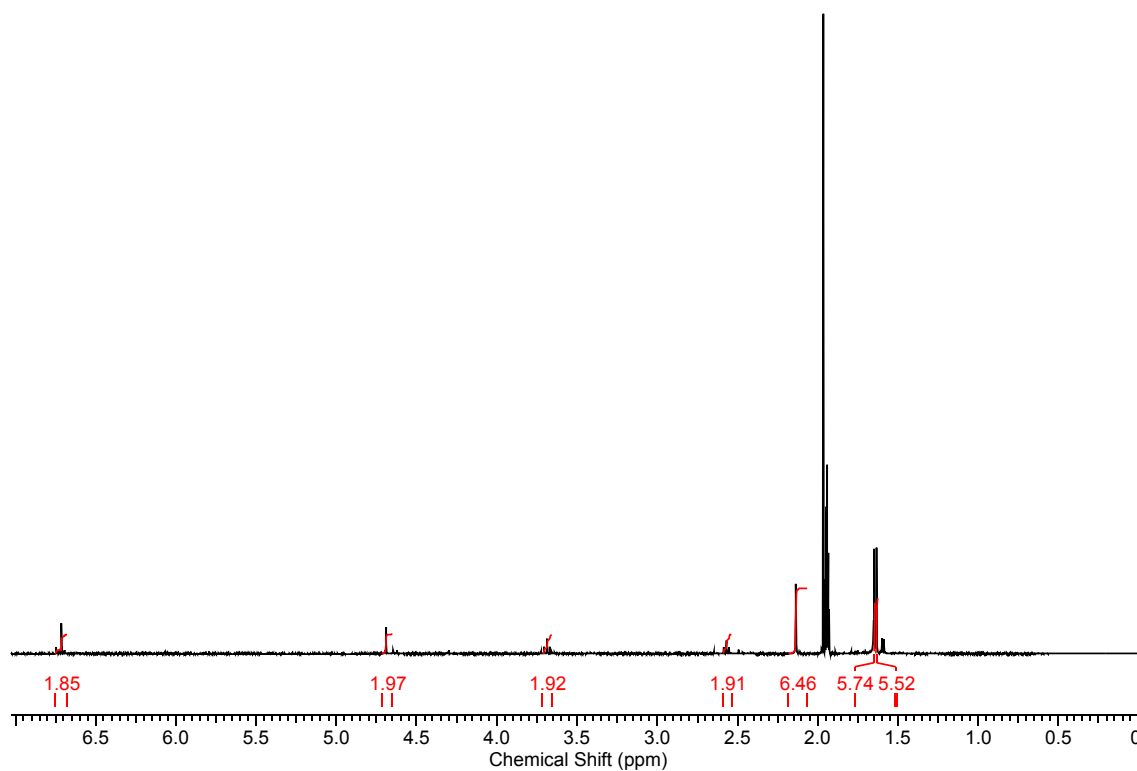

**Figure S5:**  $^1\text{H}$  NMR spectrum (400 MHz,  $\text{CD}_3\text{CN}$ , 27  $^\circ\text{C}$ ) of  $[\text{Ru}(\text{Me}_4\text{CH}_2\text{Cp}^{\text{Mal}})(\text{MeCN})_3][\text{BF}_4]$  (**4**).

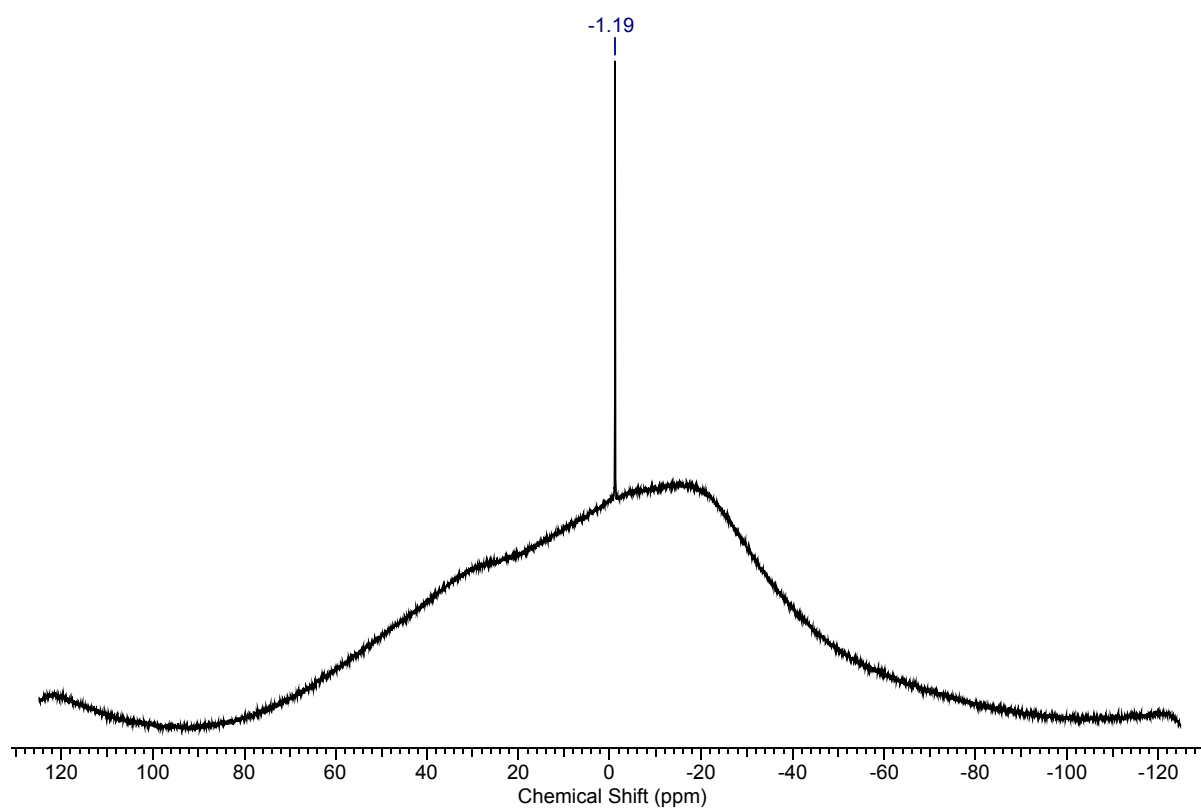

**Figure S6:**  $^{11}\text{B}\{^1\text{H}\}$  NMR spectrum (128 MHz,  $\text{CD}_3\text{CN}$ , 27  $^\circ\text{C}$ ) of  $[\text{Ru}(\text{Me}_4\text{CH}_2\text{Cp}^{\text{Mal}})(\text{MeCN})_3][\text{BF}_4]$  (**4**).

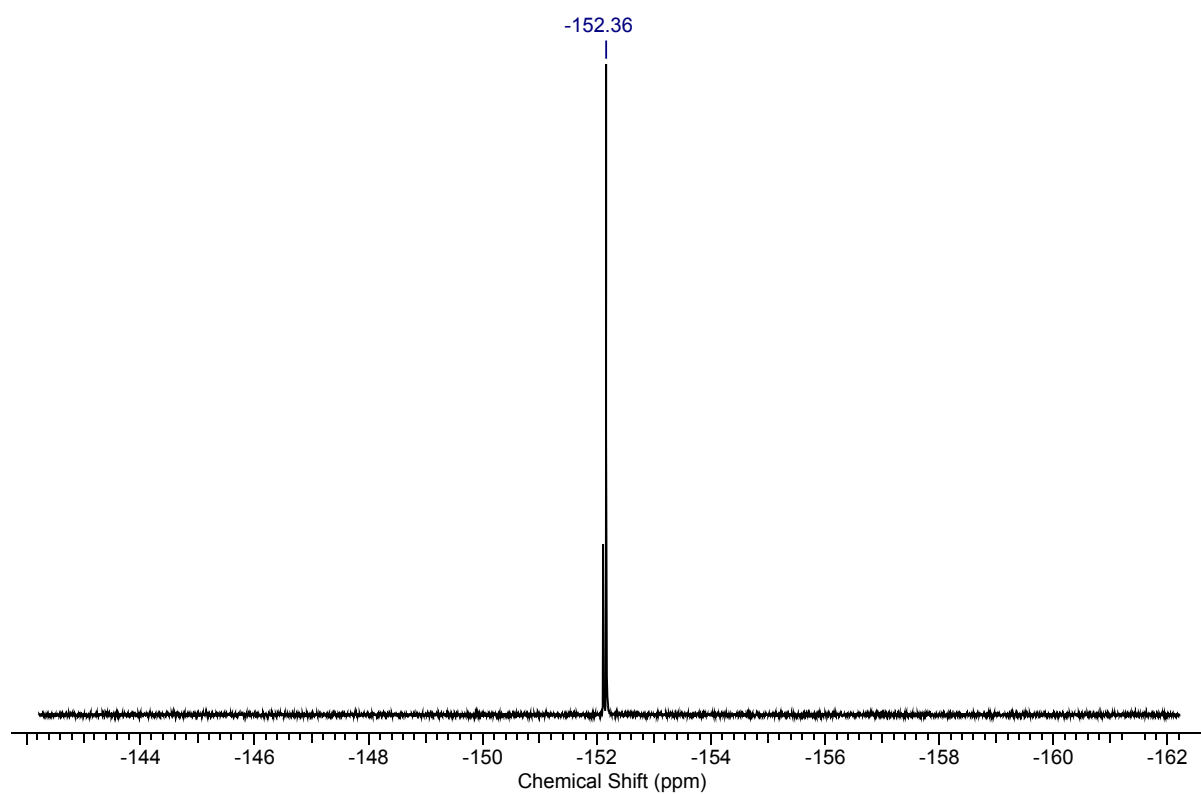

**Figure S7:**  $^{19}\text{F}\{^1\text{H}\}$  NMR spectrum (376 MHz,  $\text{CD}_3\text{CN}$ , 27 °C) of  $[\text{Ru}(\text{Me}_4\text{CH}_2\text{Cp}^{\text{Mal}})(\text{MeCN})_3][\text{BF}_4]$  (**4**).

### 2.3. Coupling to FhuA

In a nitrogen filled glovebox, FhuA wildtype or FhuA  $\Delta$ CVF<sup>tev</sup> containing 1 (w/w)% SDS was dissolved in water (10 mL, 10 mg/mL), respectively.  $[\text{Ru}(\text{Me}_4\text{CH}_2\text{Cp}^{\text{Mal}})(\text{MeCN})_3][\text{BF}_4]$  (**4**) (10 equiv.) in MeCN (10 (v/v)%) was added and stirred for 16 h. The solvent was removed *in vacuo* and the residue was washed with degassed MeCN (3 x 10 mL). The residue was dissolved in degassed water (10 mL) and transferred to a dialysis tube (MWCO = 12-14 kDa). Dialysis proceeded against a sodium phosphate buffer with 100-fold volume compared to the protein solution. The buffered solution contained sodium phosphate (NaPi, 100 mM, pH = 8), EDTA (1 mM), 2-Methyl-2,4-pentanediol (MPD, 50 mM) and water. The dialysis solution was changed after 24 h and dialysis was performed for 48-96 hours.

### 2.4. CD-Spectroscopy

Circular dichroism (CD) spectra were recorded on a *J-1100* spectrometer (JASCO) equipped with a single position Peltier element. The temperature was set to 20 °C. The pathlength of the cuvette was 0.5 mm. Protein concentrations were adjusted to 20  $\mu\text{M}$ . For variable temperature CD (VTCD) spectroscopy, temperatures from 4 °C to 92 °C were measured in 2 °C steps with a heating-ramp of 1 °C/min. Measurements were started when the target temperature was stable for more than 10 seconds. The temperature was measured inside the cuvette. Spectra were recorded with four accumulations in a range from 260 to 190 nm.

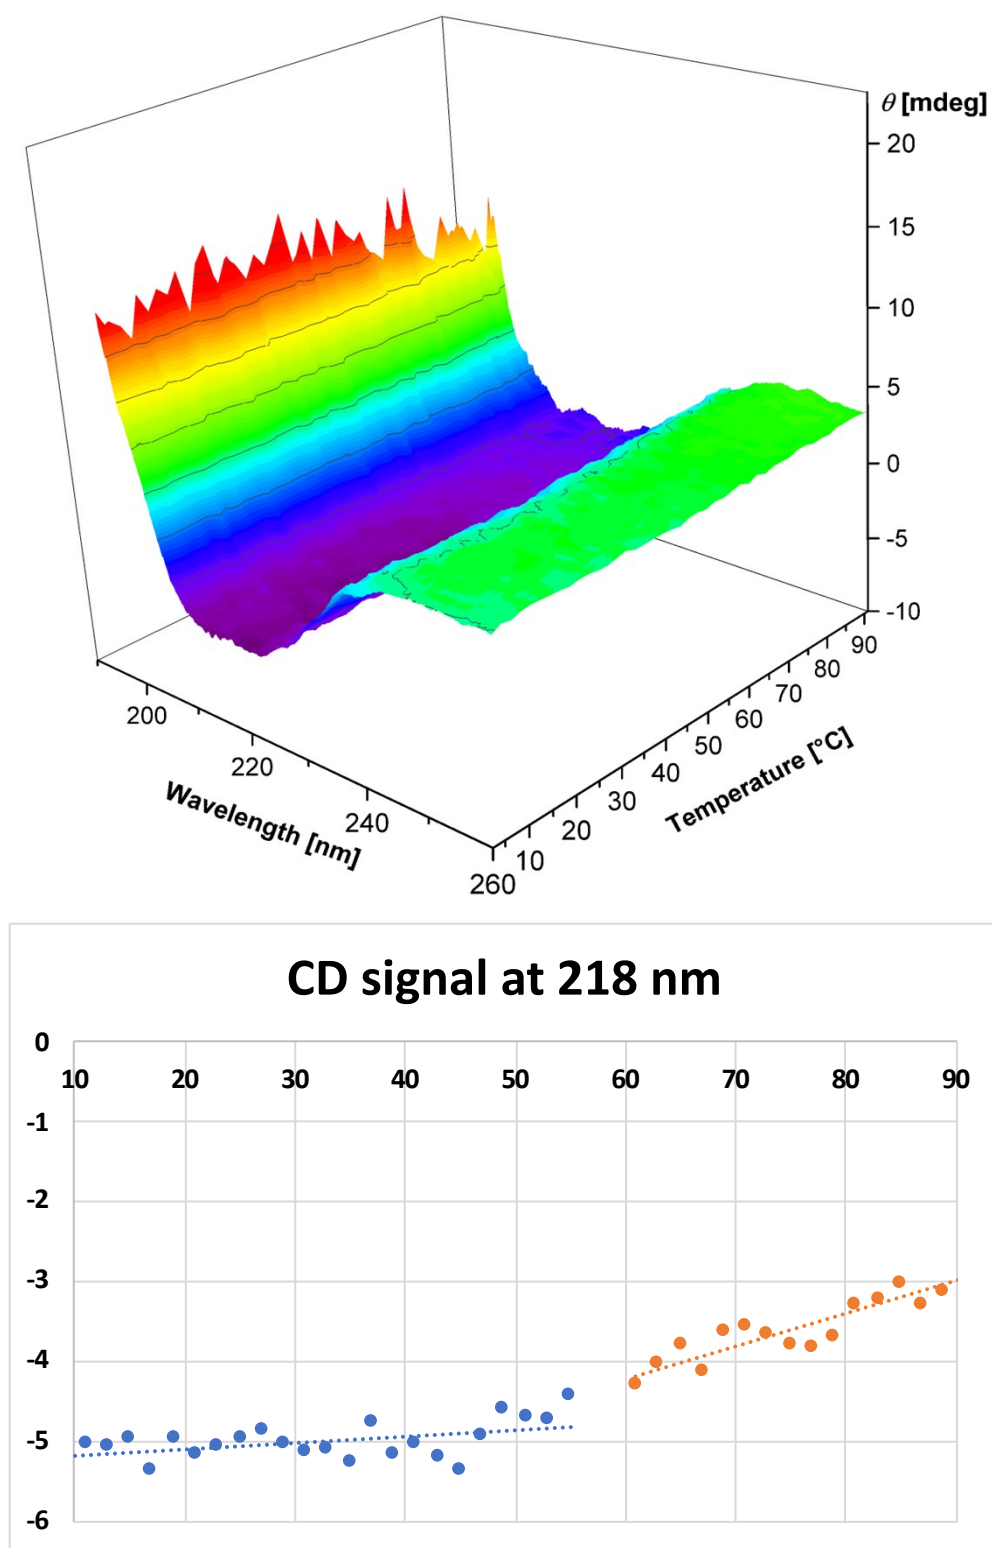

**Figure S8:** Variable temperature CD spectroscopy. The CD spectrum of FhuA shows characteristic minimum at 218 nm and maximum at 196 nm, indicating a  $\beta$ -sheet structure. Structural integrity is confirmed for temperatures up to 60 °C. Above ca. 60 °C, minimal changes in the CD spectra are observed, however, the protein is not fully denatured up the 90°C.

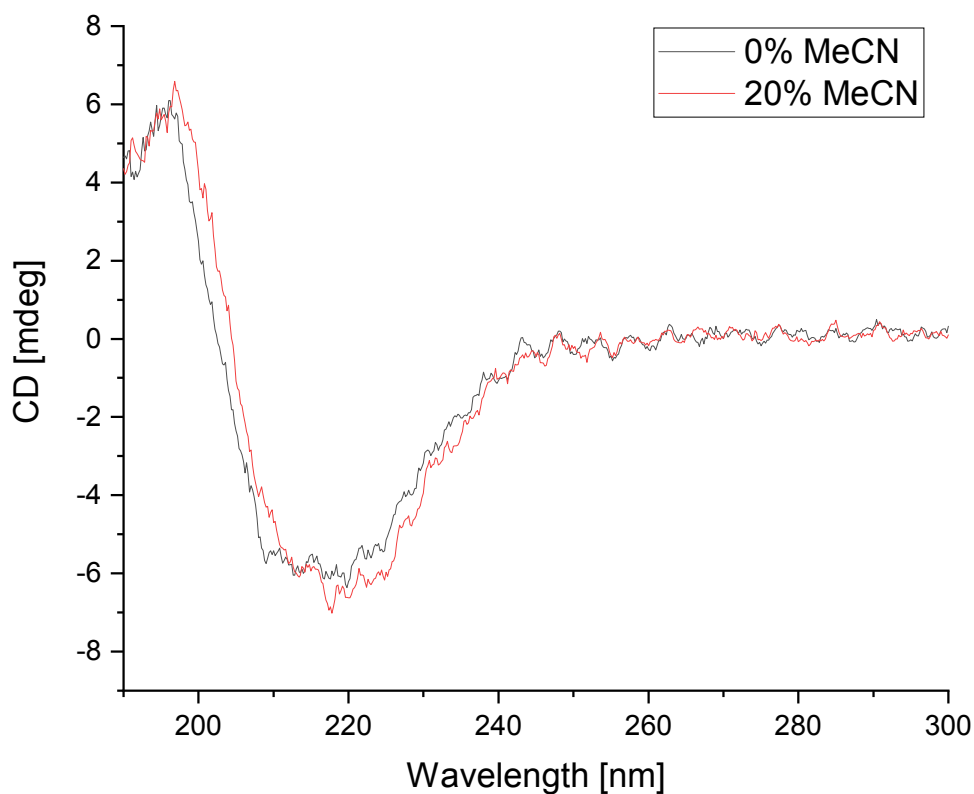

**Figure S9:** Comparison of CD spectra of **6** with (red) and without (black) 20% MeCN.

## 2.5. ThioGlo

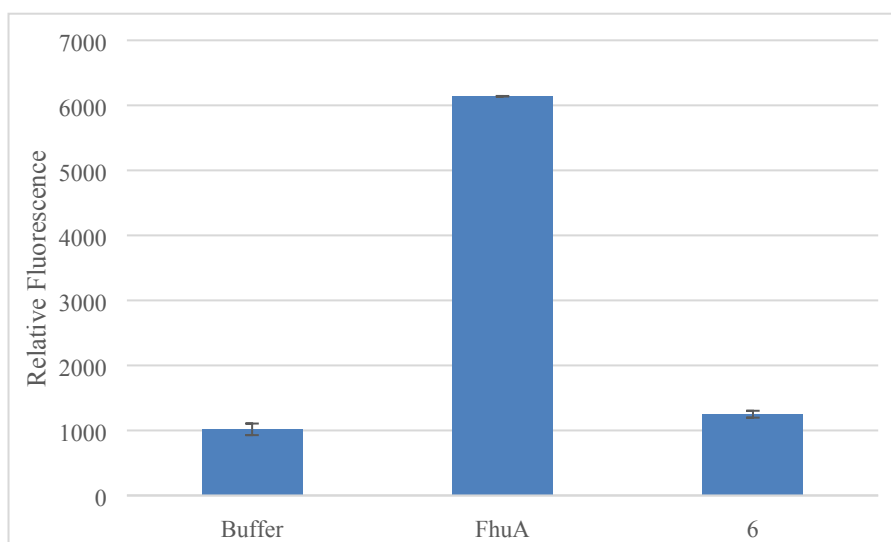

**Figure S10:** Fluorescence measurement of FhuA and biohybrid catalyst **6** treated with ThioGlo. Low fluorescence indicate a high coupling efficiency, because ThioGlo becomes fluorescent upon conjugation to a thiol. Sample preparation was performed as previously reported.<sup>5</sup> In the given example, the coupling efficiency was 95% ( $1 - ((1249.5 - 1017) / (6140 - 1017)) \times 100 = 95\%$ ). As reference, untreated FhuA of the same biological batch was used.

## 2.6. MALDI-ToF MS

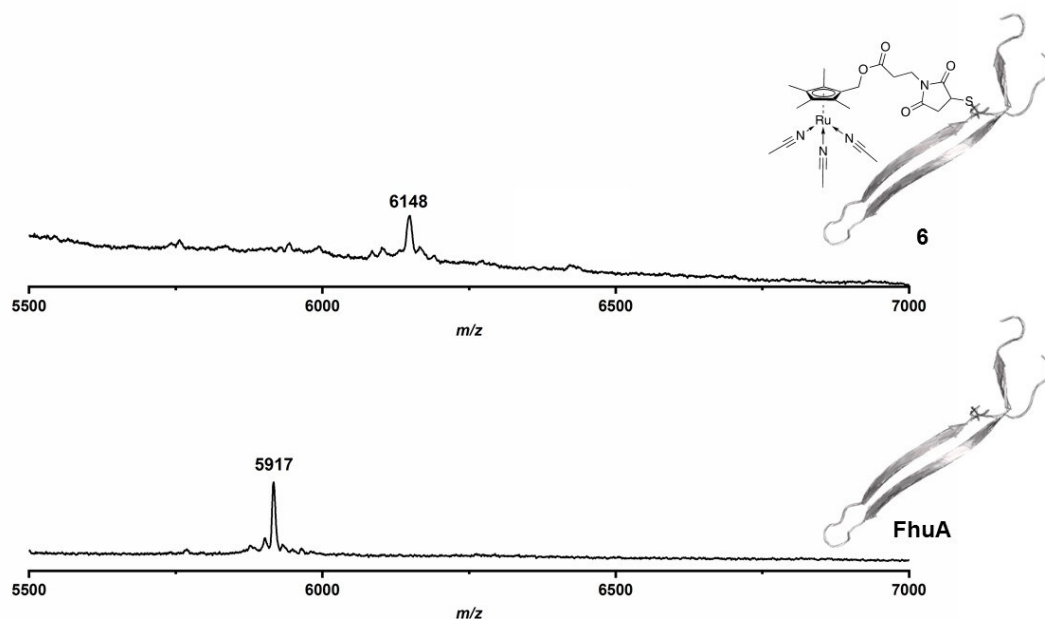

**Figure S11.** MALDI-ToF MS spectrum after TEV cleavage<sup>5</sup> of **6** (top) and FhuA without a catalyst attached (bottom). The calculated mass for the cleaved FhuA fragment (5902 Da) is in good agreement with the observed mass (5917 Da). The observed signal at  $m/z$  = 6148 was assigned to the ligand having the ester moiety cleaved and the maleimide moiety hydrolyzed (calc.  $[\text{C}_7\text{H}_{13}\text{NNaO}_6]^+$ : 6147 Da).

## 2.7. Catalysis

In a typical catalysis run, protein-free catalyst **4** (5 mol%) or biohybrid catalyst **6** (0.5 mol%) were dissolved in sodium phosphate buffer (NaPi, 100 mM, 1 mM EDTA) containing 2-Methyl-2,4-pentandiol (MPD, 50 mM) and 20 (v/v)% MeCN inside a nitrogen-filled glovebox. The coupling efficiency of the biohybrid catalyst **6** was determined with the ThioGlo cysteine titration prior to catalysis (see section “2.5 ThioGlo”), as previously established.<sup>4</sup> The concentration is given with respect to the coupled catalyst. That is, the metal loading was constantly 0.5 mol% in all catalytic runs. For example, if the coupling efficiency was determined to be 96%, the amount of protein corresponds to 0.52 mol% ( $0.5 \text{ mol\%}_{\text{metal loading}} / 0.96 = 0.52 \text{ mol\%}_{\text{protein loading}}$ ). 4-butenol (**c(7)** = 32 mM) and 5-hexynenitrile (**c(8)** = 32 mM) were added (Total reaction volume: 1 mL). The reaction vial was placed in an oil bath at 60 °C. After the reaction time indicated, the reaction mixture was extracted with DCM containing 1 mM mesitylene as internal standard, dried over  $\text{MgSO}_4$  and analyzed *via* GCMS. The TOF value was calculated by dividing the TON by the reaction time indicated.

### 3. References

1. G. R. Fulmer, A. J. M. Miller, N. H. Sherden, H. E. Gottlieb, A. Nudelman, B. M. Stoltz, J. E. Bercaw and K. I. Goldberg, *Organometallics*, 2010, **29**, 2176.
2. D. S. Perekalin, A. P. Molotkov, Y. V. Nelyubina, N. Y. Anisimova and A. R. Kudinov, *Inorg. Chim. Acta*, 2014, **409**, 390.
3. M. Christmann, R. de Figueiredo, P. Oczipka and R. Fröhlich, *Synthesis*, 2008, **2008**, 1316.
4. S. J. Tenne and U. Schwaneberg, *Int. J. Mol. Sci.*, 2012, **13**, 2459.
5. F. Philippart, M. Arlt, S. Gotzen, S. J. Tenne, M. Bocola, H. H. Chen, L. Zhu, U. Schwaneberg and J. Okuda, *Chem. Eur. J.*, 2013, **19**, 13865.
